# Supplementary material for: Magnetite doped metal–organic framework nanocomposites: an efficient adsorbent for removal of bisphenol-A pollutant
Source: Royal Society of Chemistry journal article supplement (doi:10.1039/d0nj05622g), 2021-01-01
Supplement: d0nj05622g1.pdf [file d0nj05622g1.pdf]

## Supplementary Information

### Magnetite Doped Metal-Organic Framework Nanocomposites: An Efficient Adsorbent for Removal of Bisphenol-A Pollutant

Okan Icten\*, Demet Ozer

Hacettepe University, Faculty of Science, Department of Chemistry, Ankara, Turkey

[\\*okanicten@hacettepe.edu.tr](mailto:okanicten@hacettepe.edu.tr)

**Table S1.** The general physicochemical properties of BPA

| Properties                | Bisphenol A                                                                          |
|---------------------------|--------------------------------------------------------------------------------------|
| Structure                 | 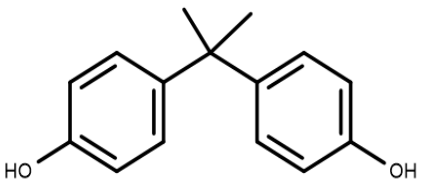 |
| Usage                     | Plastic and resin                                                                    |
| Formula                   | C <sub>15</sub> H <sub>16</sub> O <sub>2</sub>                                       |
| CAS number                | 80-05-7                                                                              |
| MW (g/mol)                | 228.29                                                                               |
| MV (cm <sup>3</sup> /mol) | 199.5                                                                                |
| pKa                       | 9.6                                                                                  |
| LogK <sub>ow</sub>        | 3.32                                                                                 |
| Diameter (Å)              | 7.5                                                                                  |
| Dipole moment (Debye)     | 1.41                                                                                 |

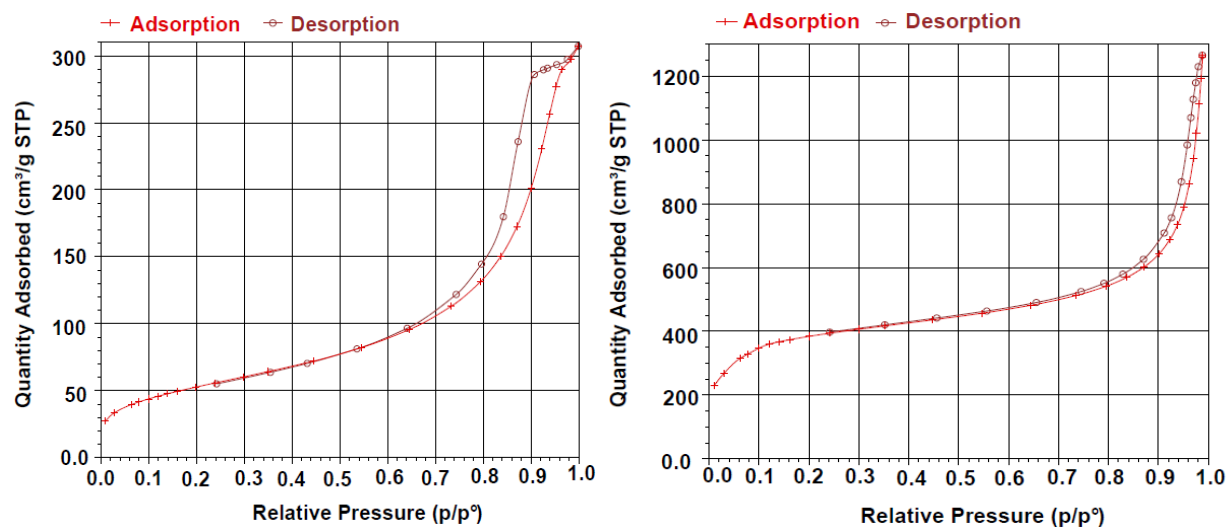

**Fig. S1.** N<sub>2</sub> adsorption/desorption isotherms of (a) Fe<sub>3</sub>O<sub>4</sub>@Dex, and (b) MOF:Fe<sub>3</sub>O<sub>4</sub>@Dex(80) nanocomposite structures.

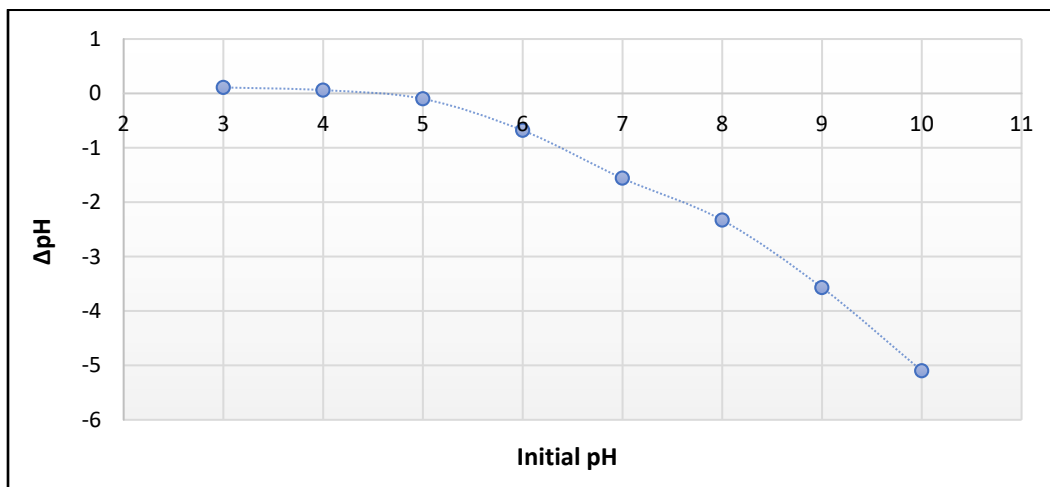

**Fig. S2.** Experimental immersion technique curves for MOF:Fe<sub>3</sub>O<sub>4</sub>@Dex nanocomposite

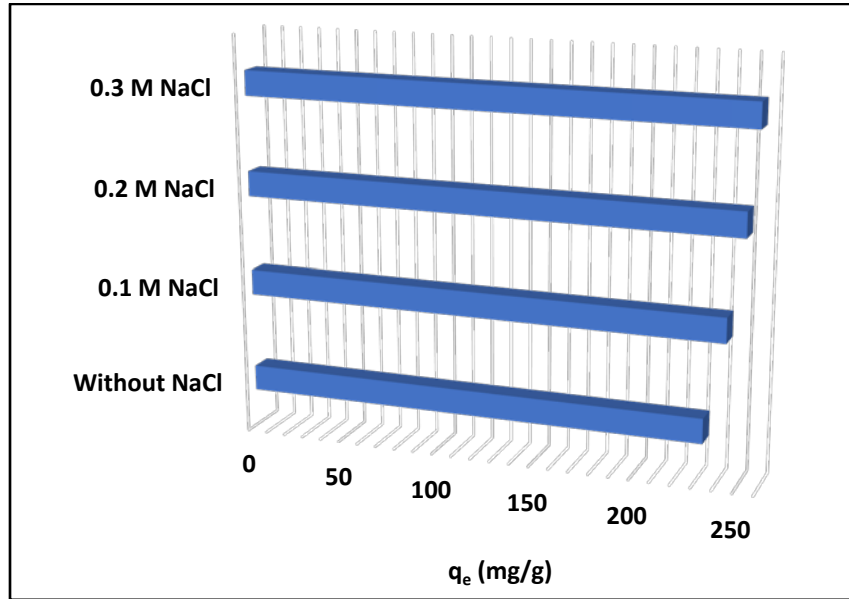

**Fig. S3.** Effects of NaCl concentrations

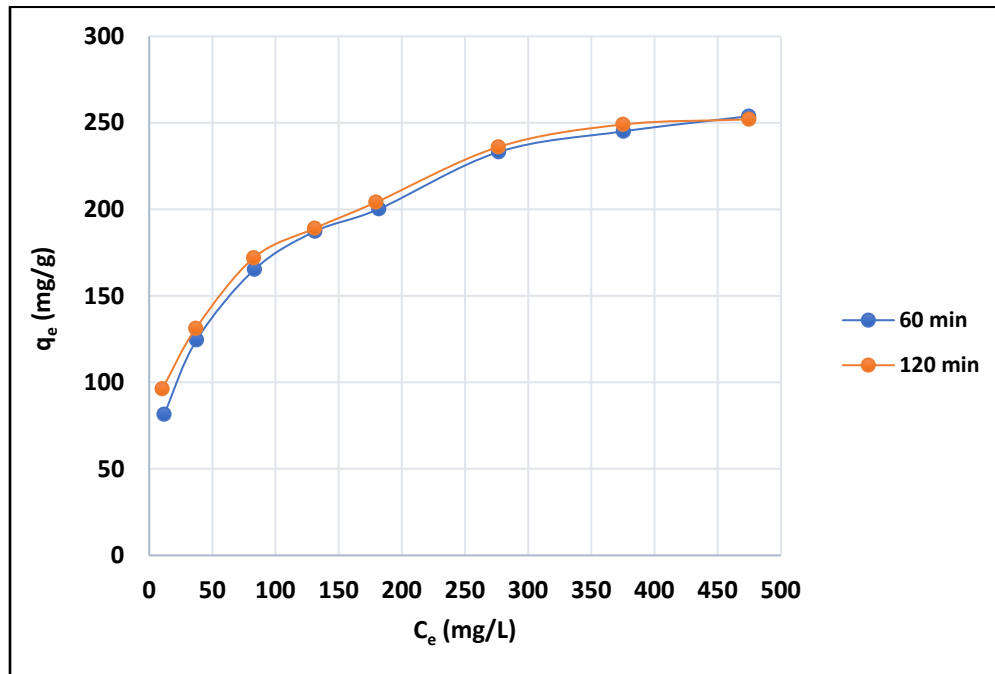

**Fig. S4.** Experimental isotherm curve

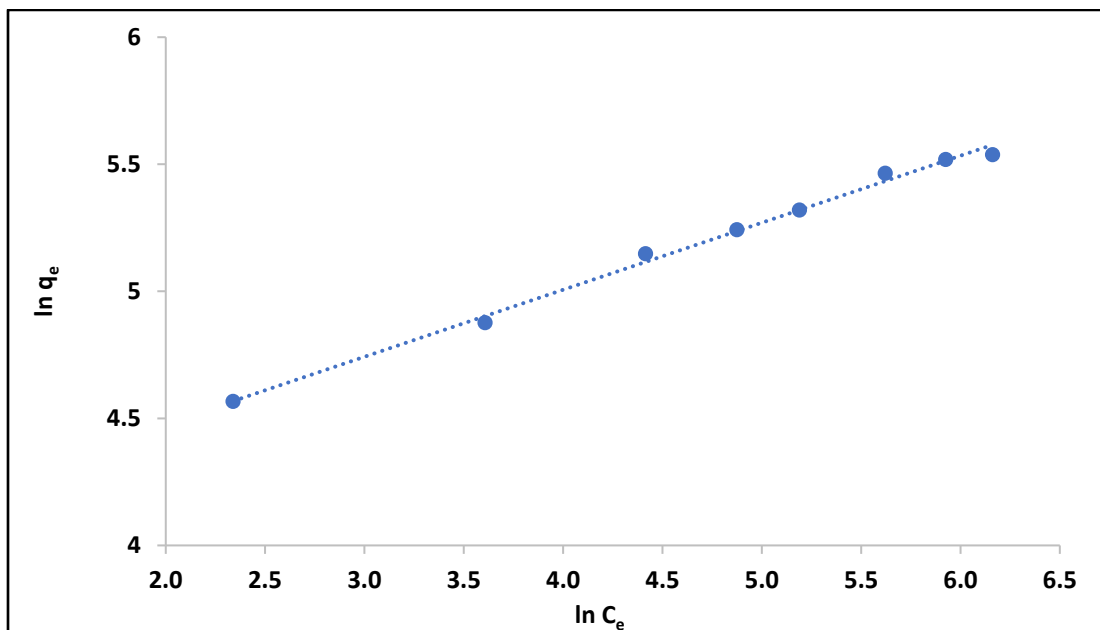

**Fig. S5.** Freundlich adsorption isotherm

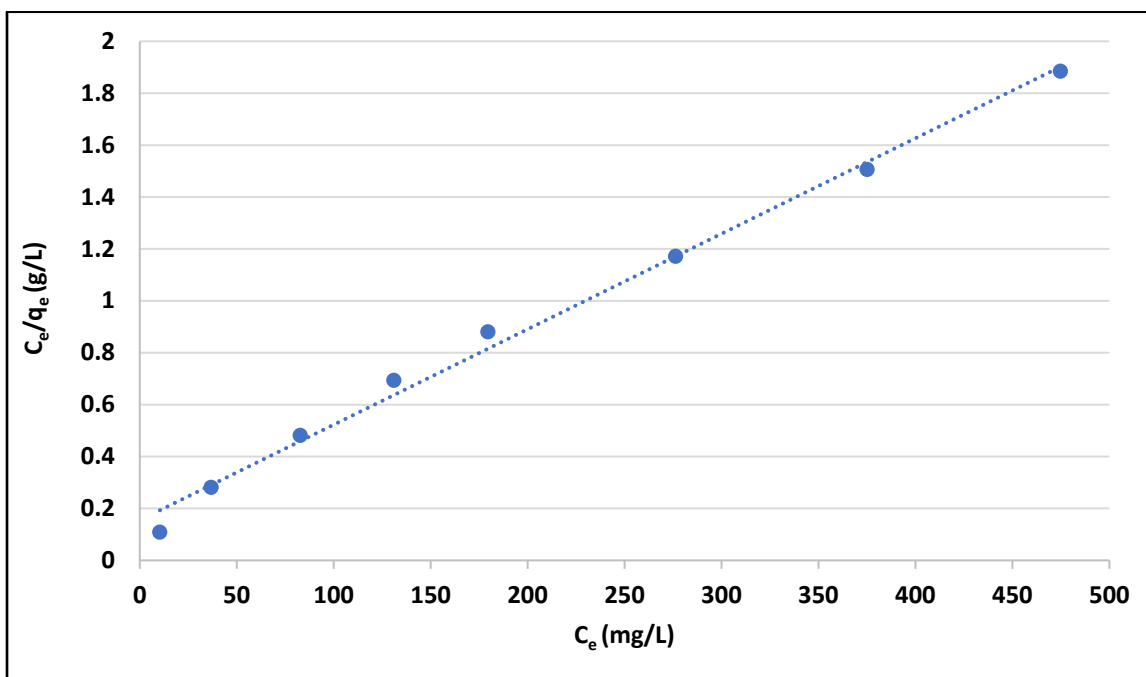

**Fig. S6.** Langmuir adsorption isotherm

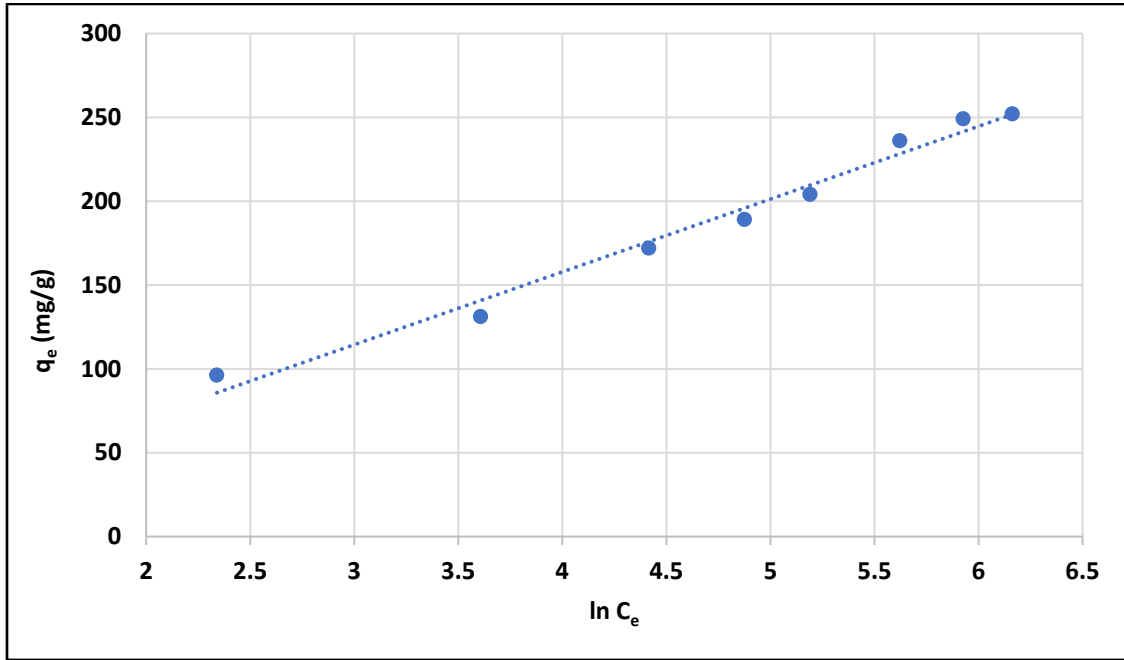

**Fig. S7.** Temkin adsorption isotherm

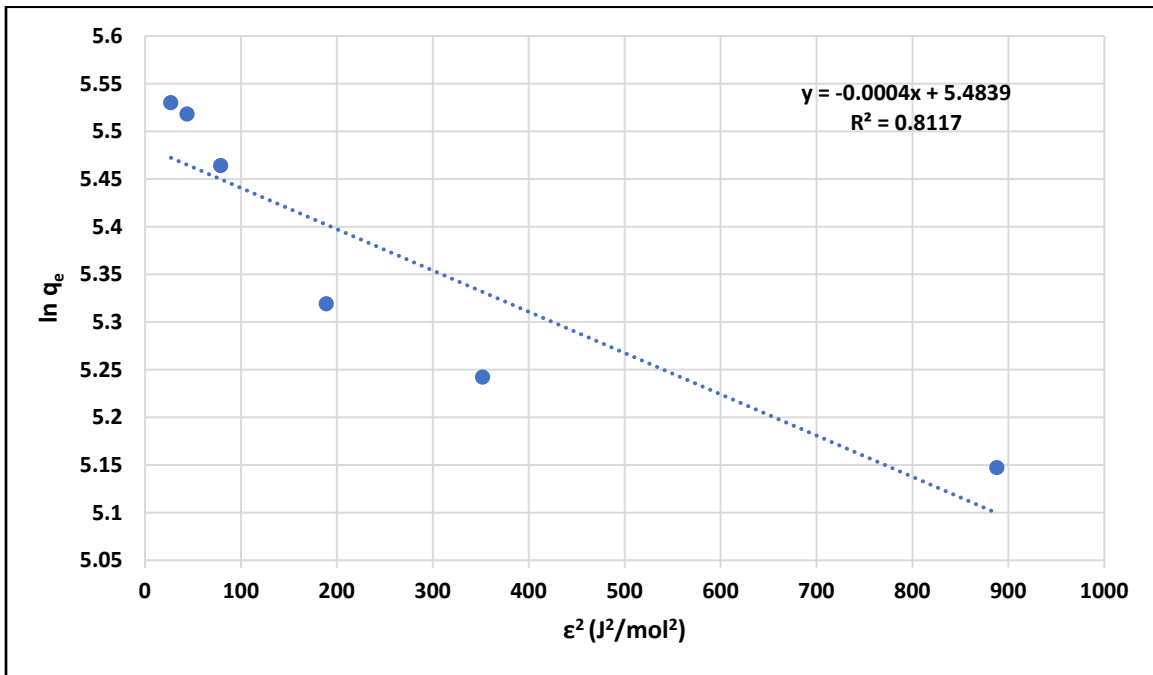

**Fig. S8.** Dubinin-Redushkevich isotherm (D-R model)

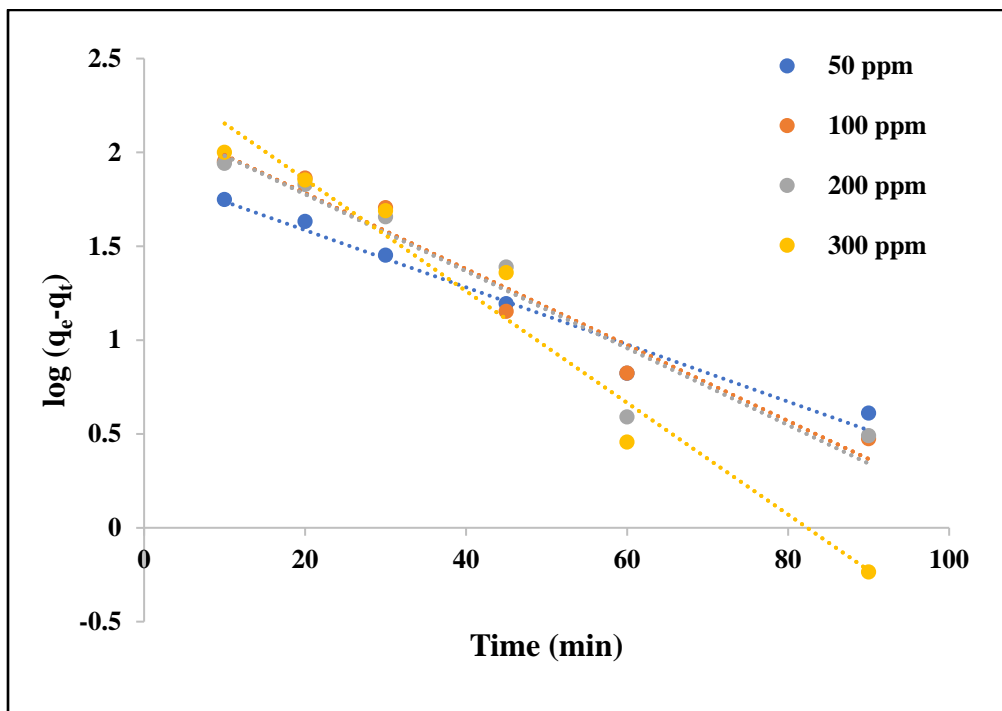

**Fig. S9.** Pseudo-first order kinetic plots for the adsorption of BPA using MOF:Fe<sub>3</sub>O<sub>4</sub>@Dex(80) composite at different initial BPA concentrations

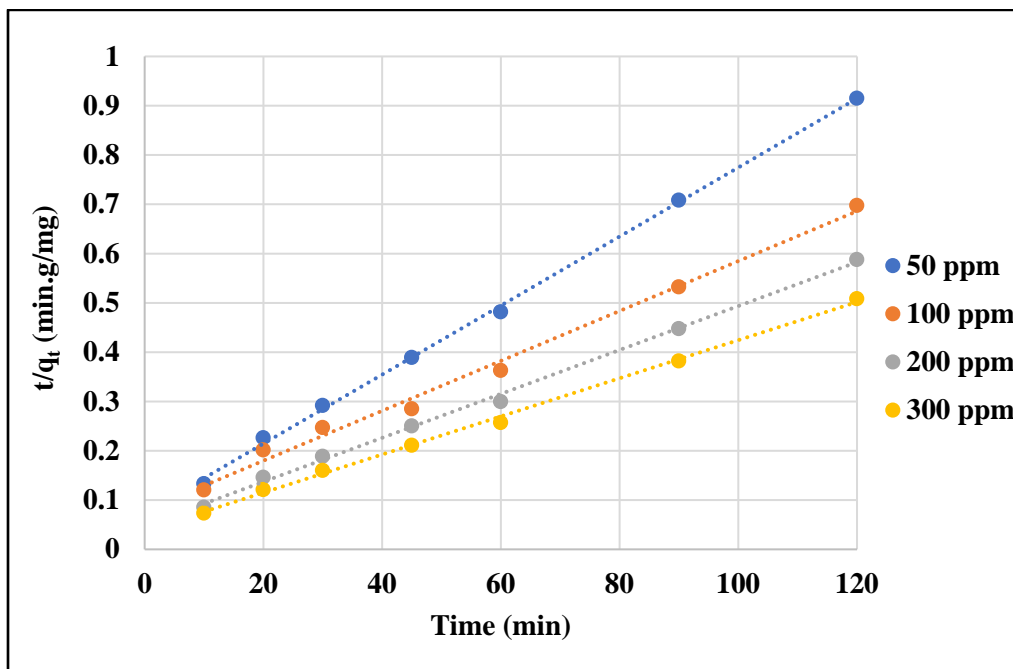

**Fig. S10.** Pseudo-second order kinetic plots for the adsorption of BPA using MOF:Fe<sub>3</sub>O<sub>4</sub>@Dex(80) composite at different initial BPA concentrations

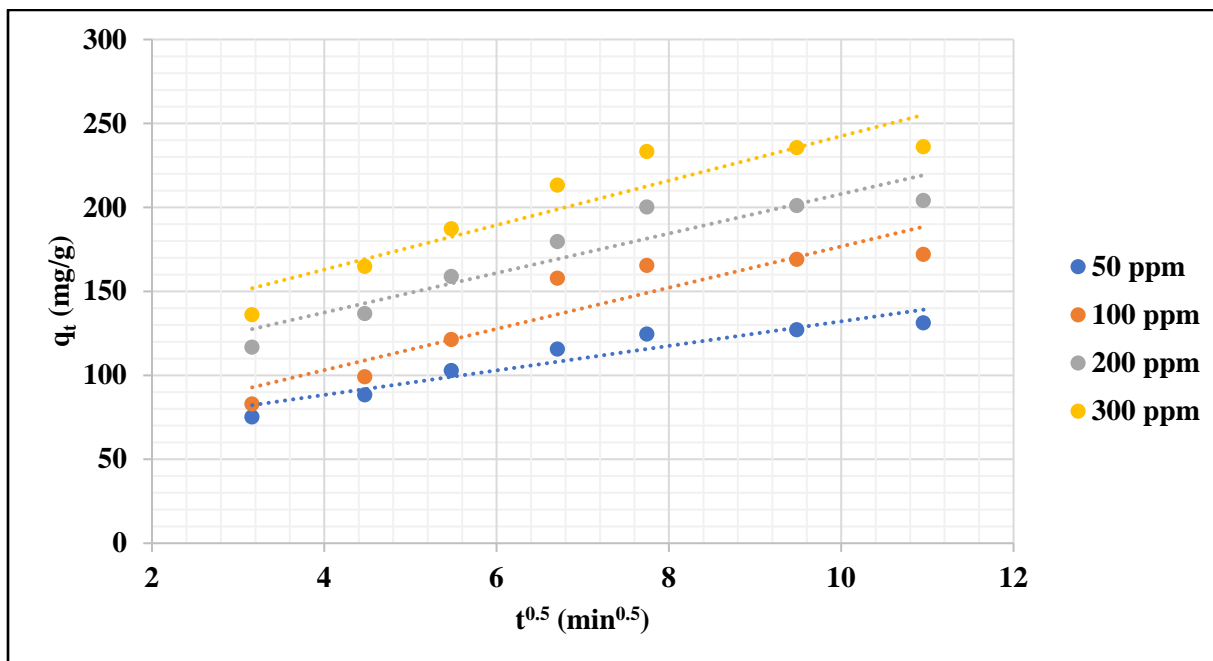

**Fig. S11.** The intraparticle diffusion model for the adsorption of BPA using MOF:Fe<sub>3</sub>O<sub>4</sub>@Dex(80) composite at different initial BPA concentrations

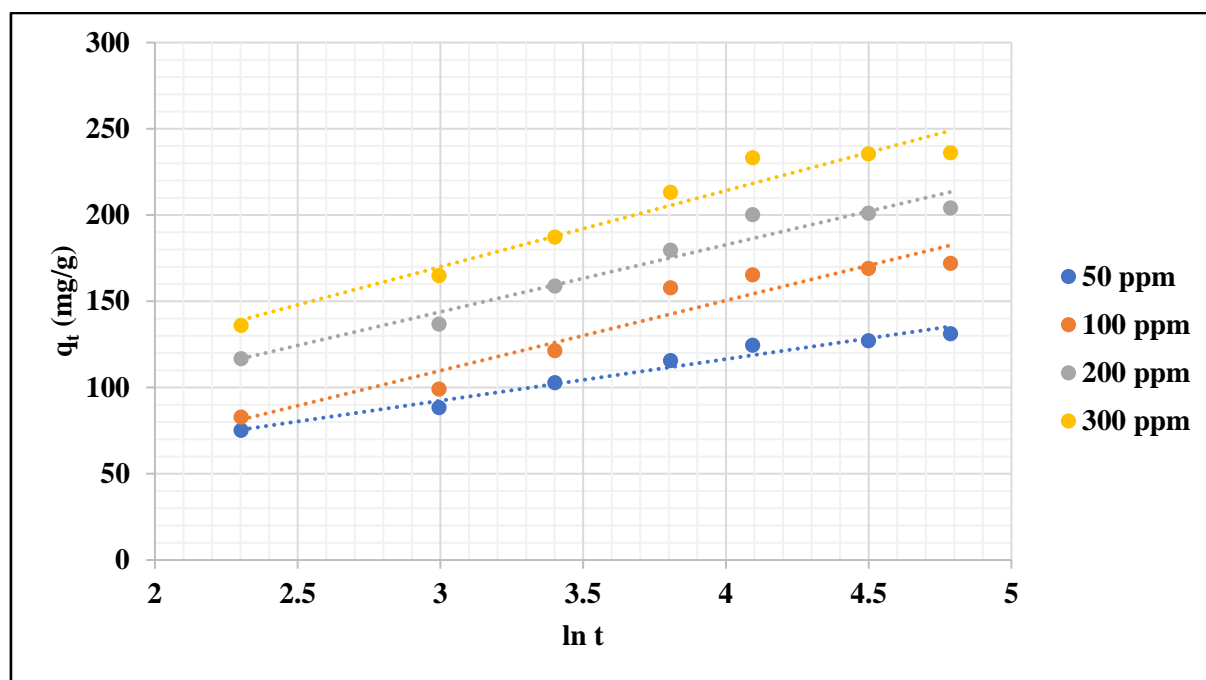

**Fig. S12.** The Elovich model for the adsorption of BPA using MOF:Fe<sub>3</sub>O<sub>4</sub>@Dex(80) composite at different initial BPA concentrations

## ADSORPTION AND KINETIC EQUATIONS<sup>1,2</sup>

$$\frac{C_e}{q_e} = \frac{1}{K_L q_m} + \frac{C_e}{q_m} \quad (\text{equation S1})$$

$$\ln q_e = \ln K + \frac{1}{n} \ln C_e \quad (\text{equation S2})$$

$$R_L = \frac{1}{1 + bC_i} \quad (\text{equation S3})$$

$$q_e = B \ln A + B \ln C_e \quad (\text{equation S4})$$

$$\ln q_e = \ln q_m - \beta \varepsilon^2 \quad (\text{equation S5})$$

$$\varepsilon = RT \ln \left( 1 + \frac{1}{C_e} \right) \quad (\text{equation S6})$$

$$E = \frac{1}{\sqrt{2\beta}} \quad (\text{equation S7})$$

$$\log (q_e - q_t) = \log q_e - \frac{k}{2.303} t \quad (\text{equation S8})$$

$$\frac{t}{q_t} = \frac{1}{h} + \frac{t}{q_e} \quad (\text{equation S9})$$



$$q_t = k_3 \cdot t^{0.5} \quad (\text{equation S10})$$

$$q_t = \frac{\ln a_e b_e}{b_e} + \frac{1}{b_e} \ln t \quad (\text{equation S11})$$

$q_e$  = The amount of BPA adsorbed per unit mass of adsorbent (mg/g).

$C_e$  = The equilibrium concentration of the solute in the bulk solution (mg/L).

$q_{\max}$  = The maximum adsorption capacity.

$K_L$  = Langmuir constant (b).

$C_i$  = The initial concentration of the solution (mg/L)

$B$  = The Temkin constant related to heat of sorption ( $\text{J mol}^{-1}$ )

$A_0$  = The Temkin equilibrium binding constant (L/g)

$\beta$  = The constant of the adsorption energy ( $\text{mol}^2 \text{J}^{-2}$ )

$\varepsilon$  = Polanyi potential

$R$  = The gas constant ( $8.314 \text{ J mol}^{-1} \text{ K}^{-1}$ )

$T$  = The absolute temperature (K)

$E$  = The value of mean energy of adsorption ( $\text{kJ mol}^{-1}$ )

$q_t$  = BPA adsorbed at time  $t$  (mg/g)

$h$  = Initial sorption rate

$k$  = The pseudo-second-order rate constant (g/mg.min)

$k_3$  = The intraparticle diffusion rate constant ( $\text{mg.g}^{-1}.\text{min}^{-0.5}$ )

$a_e$  = The initial adsorption rate,  $\text{mg (g}^{-1}.\text{min}^{-1})$

$b_e$  = The extent of surface coverage

- 1 J. Ma, S. Li, G. Wu, M. Arabi, F. Tan, Y. Guan, J. Li and L. Chen, *J. Ind. Eng. Chem.*, 2020, **90**, 178-189.
- 2 M. Pan, X. Lin, J. Xie and X. Huang, *RSC advances*, 2017, **7**, 4492-4500.
